# Supplementary material for: Observation of partial reduction of manganese in the lithium rich layered oxides, 0.4Li2MnO3–0.6LiNi1/3Co1/3Mn1/3O2, during the first charge
Source: Royal Society of Chemistry journal article supplement (doi:10.1039/c6cp07574f), 2016-12-02
Supplement: c6cp07574f1.pdf [file c6cp07574f1.pdf]

## Supporting Information

### Observation of partial reduction of manganese in the lithium rich layered oxides, $0.4\text{Li}_2\text{MnO}_3$ - $0.6\text{LiNi}_{1/3}\text{Co}_{1/3}\text{Mn}_{1/3}\text{O}_2$ during the first charge

*Hyung Cheoul Shim,<sup>\*,a</sup> Donghan Kim,<sup>b</sup> Dong Wook Shin,<sup>b</sup> Seungmin Hyun,<sup>a</sup> Chang-Su  
Woo,<sup>a</sup> Taewhan Yu,<sup>b</sup> and Jae-Pyoung Ahn<sup>\*,c</sup>*

<sup>a</sup> Department of Nano-Mechanics, Korea Institute of Machinery & Materials (KIMM), 156,  
Gajeongbuk-ro, Yuseong-gu, Daejeon, 305-343, Republic of Korea

<sup>b</sup> Energy Lab., Samsung Advanced Institute of Technology (SAIT), 130, Samsung-ro,  
Yeongtong-gu, Suwon-si, Gyeonggi-do, 443-803, Republic of Korea

<sup>c</sup> Advanced Analysis Center (AAC), Korea Institute of Science and Technology (KIST), 5,  
Hwarang-ro, 14-gil, Seongbuk-gu, Seoul, 130-650, Republic of Korea

E-mail: scafos@kimm.re.kr, jpahn@kist.re.kr

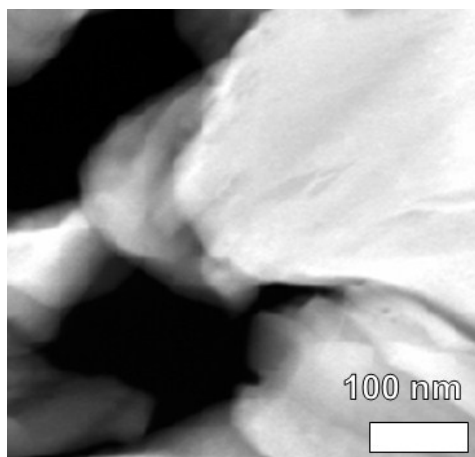

**Fig. S1** STEM image of NCM samples with discharging to 2.5 V after charging up to 4.7 V.

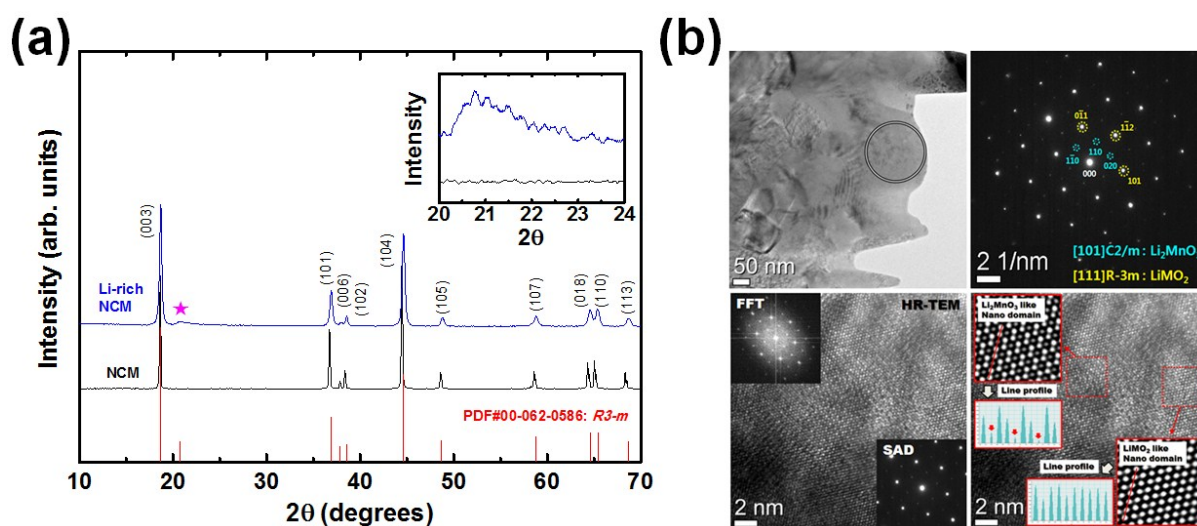

**Fig. S2** (a) XRD patterns of Li-rich NCM (blue line) and NCM (black line). The inset XRD patterns corresponding the cation-ordering peak originating from  $\text{Li}_2\text{MnO}_3$  phase, which are not observed in NCM sample. (b) TEM analysis of Li-rich NCM. The SAED pattern from Li-rich NCM shows reflection showing cation-ordering (indicated by blue dotted circles).

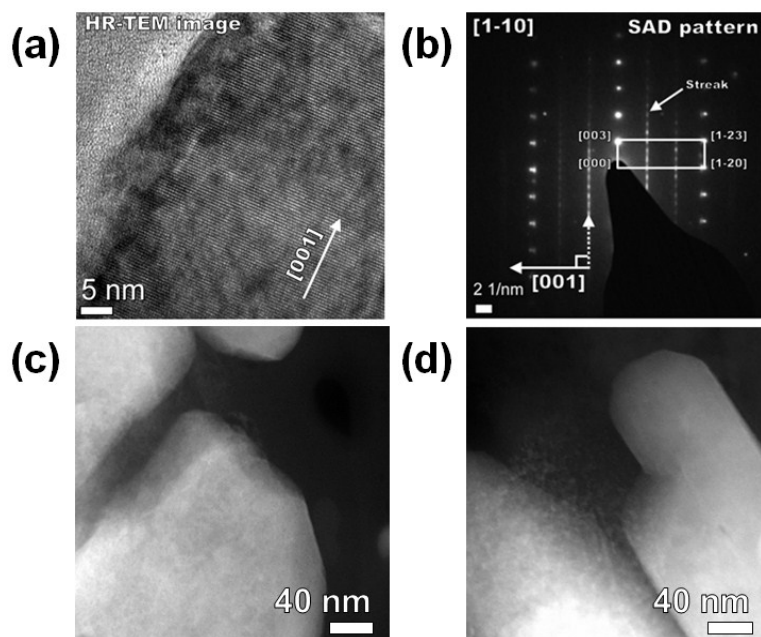

**Fig. S3** (a) High resolution TEM image (b) [1-10] zone-axis SAED patterns (c) and (d) STEM images of as-synthesized Li-rich NCM samples.

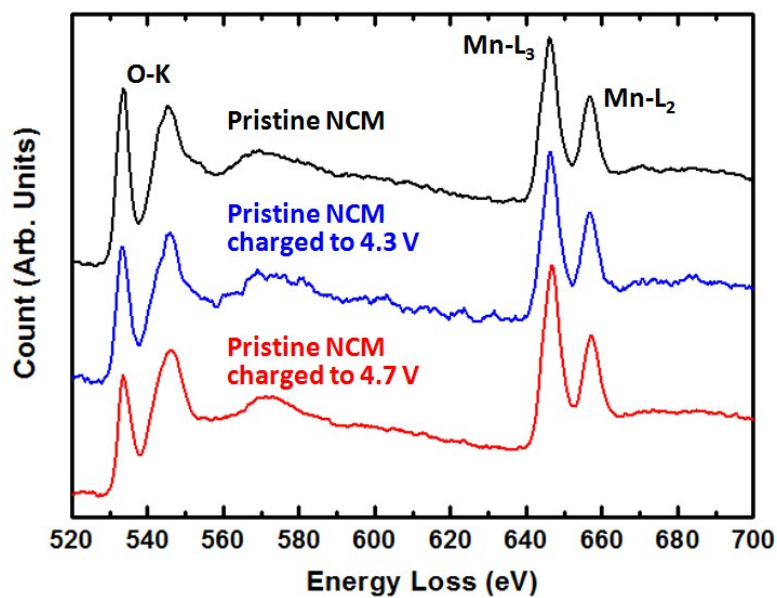

**Fig. S4** The EELS spectra of Mn L-edges and O K-edges from the as-prepared NCM (black line), NCM charged to 4.3 V (blue line) and NCM charged to 4.7 V (red line).

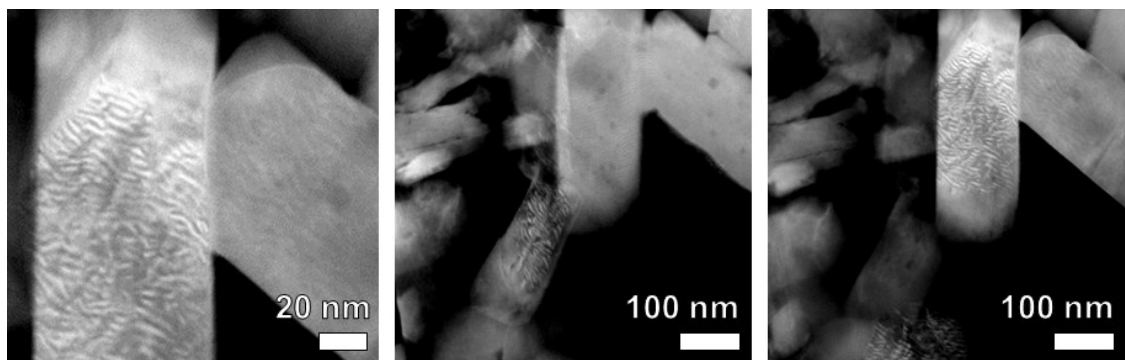

**Fig. S5** STEM images of Li-rich NCM sample with discharging to 2.5 V after charging to 4.7 V.

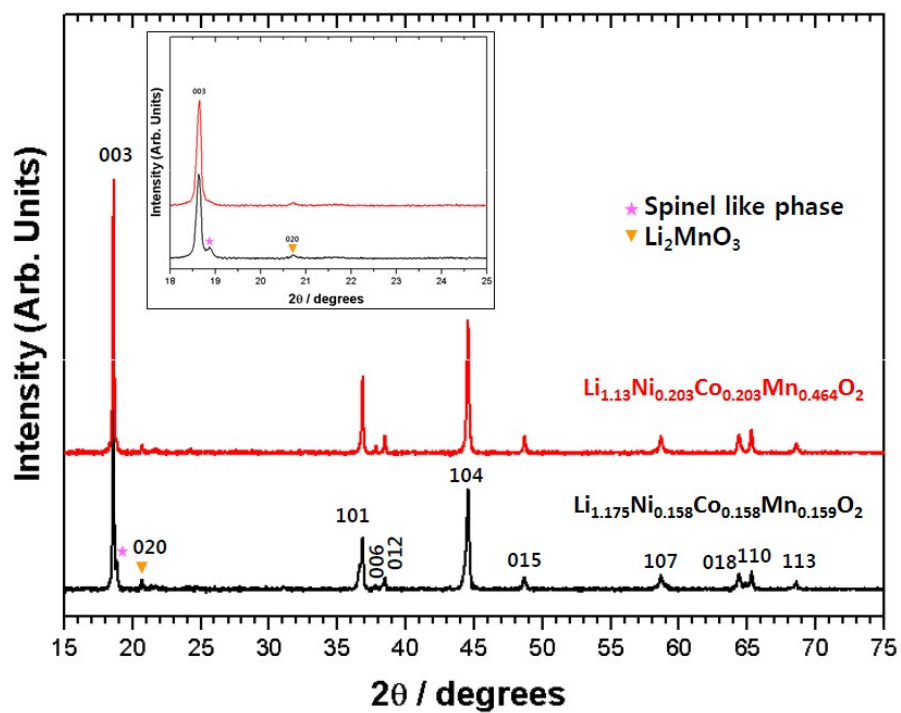

**Fig. S6** The XRD patterns of  $x\text{Li}_2\text{MnO}_3 + (1-x)\text{Li}(\text{Ni}_{1/3}\text{Co}_{1/3}\text{Mn}_{1/3})\text{O}_2$  ( $x=0.3$ ; red line,  $x=0.425$ ; black line).

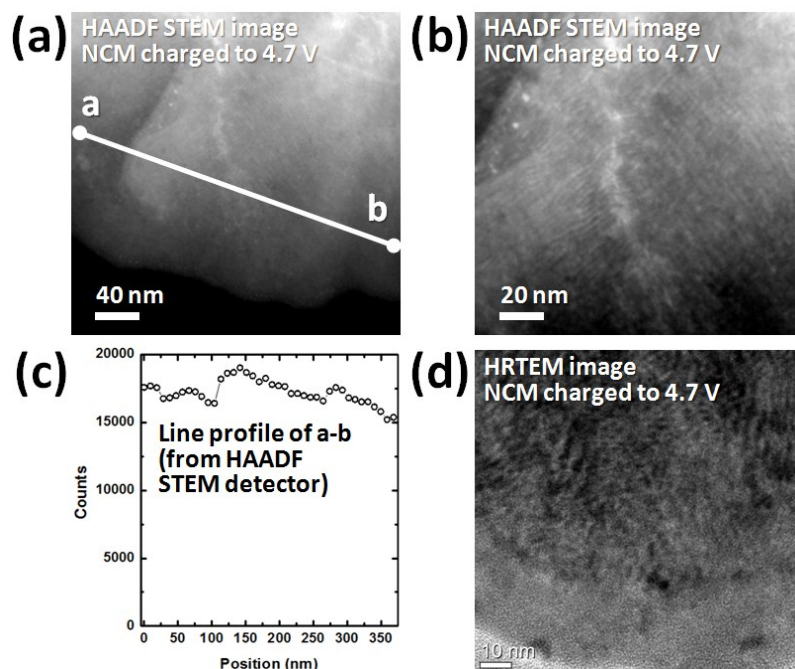

**Fig. S7** (a), (b) The HAADF-STEM images of NCM charged to 4.7 V. (c) The line profiling data from Z-contrast between a and b at Fig. S7(a). (d) HRTEM image of NCM charged to 4.7 V.

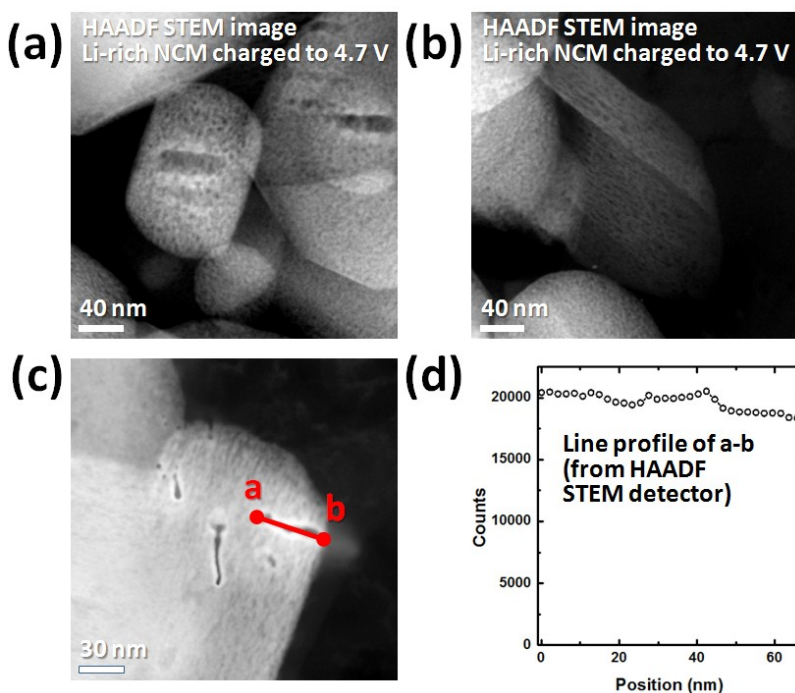

**Fig. S8** (a)-(c) The HAADF-STEM images of Li-rich NCM charged to 4.7 V. (d) The line profiling data from Z-contrast between a and b at Fig. S7(c).

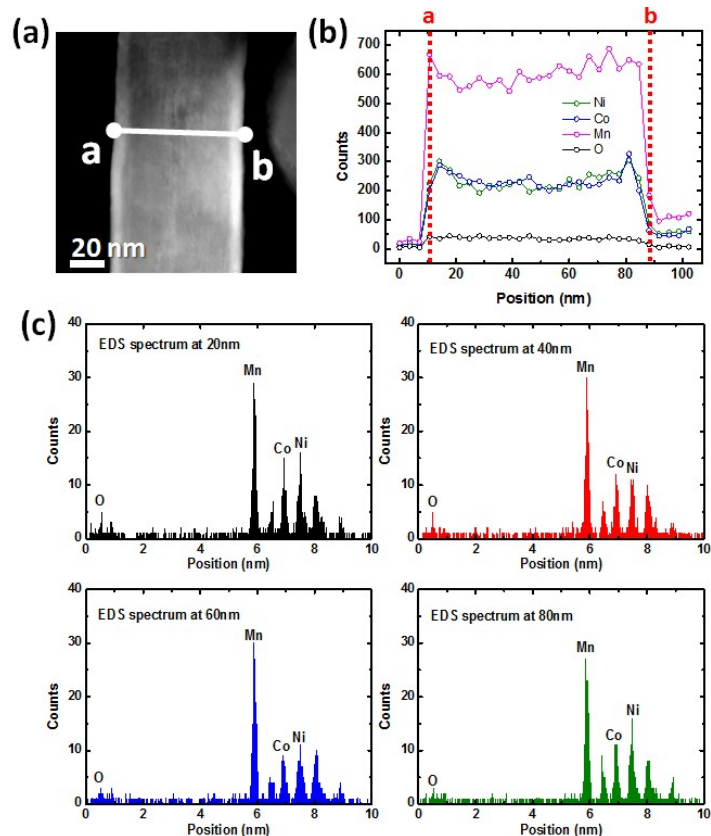

**Fig. S9** (a) HAADF-STEM image of Li-rich NCM charged to 4.7 V. (b) EDS elemental concentration profiles along the scan line a-b in the Fig. S9(a). (c) EDS spectra were extracted from the scan line a-b (20, 40, 60 and 80 nm).

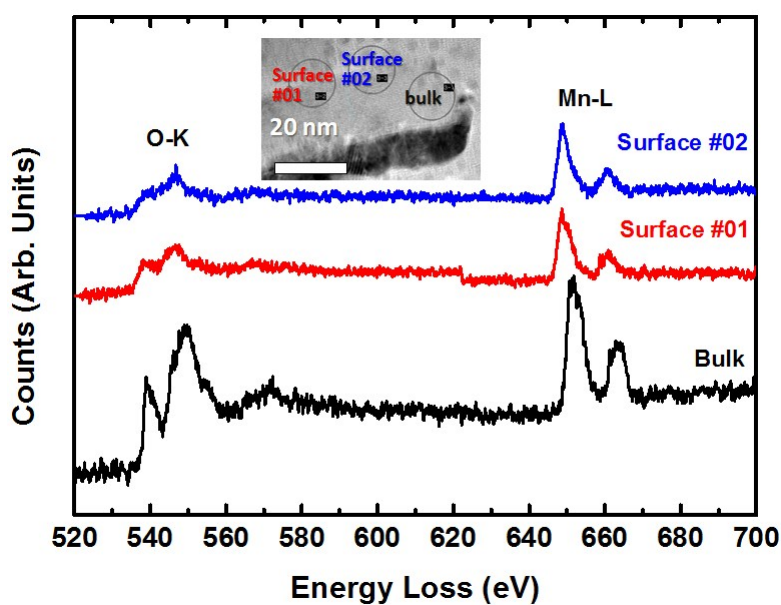

**Fig. S10** Various EELS spectra from the Li-rich NCM samples charged to 4.7 V.

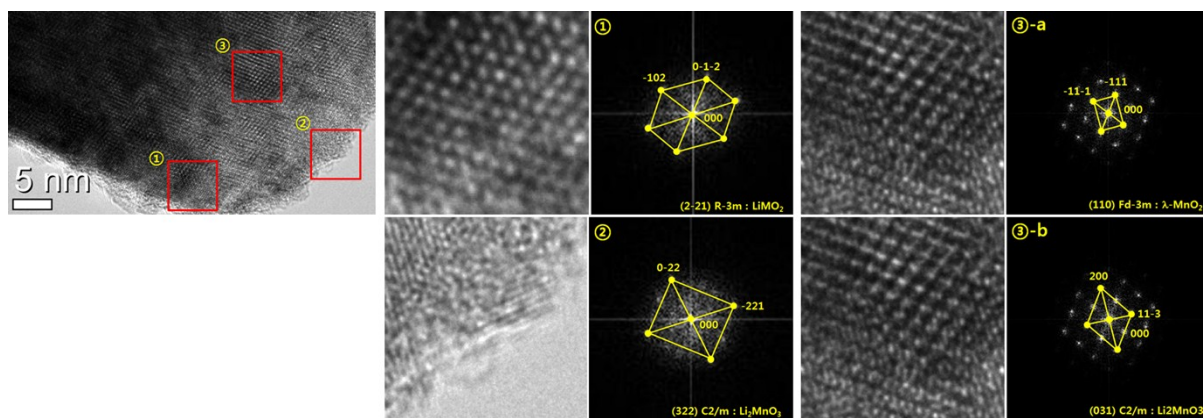

**Fig. S11** The TEM analysis of Li-rich NCM sample charged to 4.7 V
